## INFLUENCE OF OPIATES ON THE RESPIRATORY RESPONSE OF MAN TO THIOPENTAL

MARTIN HELDRICH, M.D., JAMES E. ECKENHOFF, M.D.,  
RICHARD E. JONES, M.D., AND WILLIAM D. ROLPH, JR., M.D.

CONSIDERABLE attention has been directed toward the respiratory and circulatory depressant properties of thiopental. Many of the observations have been made on animals, subjects, or patients given an opiate prior to the administration of thiopental (1-6). Data to be presented in this paper indicate that the preanesthetic administration of opiates interferes with a valid appraisal of the respiratory effects of thiopental. A quantitative study of this problem has been attempted.

### METHODS

The subjects in this study were normal, healthy volunteers between the ages of 20 and 30 years, or essentially healthy patients scheduled for minor operative procedures. Four of the subjects participated in paired studies, that is, they first received an opiate before being given thiopental, and approximately a week later received thiopental alone. Studies were completed on the patients prior to the operation. The technique employed in making and recording the respiratory measurements has been described in detail elsewhere (7). The apparatus consisted of a closed circle system incorporating a 6-liter recording spirometer, an infrared carbon dioxide analyzer (Liston-Becker), an oscillograph, carbon dioxide absorption canisters which could be shunted out of the system, and a set of valves (Stephen-Slater) to provide unidirectional flow of gases.

Control observations were made of respiratory rate, tidal volume, and end-expiratory carbon dioxide concentration. Minute volume of respiration and  $p\text{CO}_2$  were calculated. The respiratory response to endogenously accumulated carbon dioxide (canister shunted out of system) was then measured (8, 9, 10). Similar measurements were made after the administration of the drugs being studied. In many instances duplicate runs were made to demonstrate the reproducibility of control, opiate, or thiopental effect.

Thiopental was administered intravenously as a 0.2 per cent drip. The total dose was approximately 500 mg. in twenty to twenty-five

Read before the annual meeting of the American Society of Anesthesiologists in Boston, Mass., November 1, 1955, and accepted for publication January 5, 1956. The authors are in the Department of Anesthesiology, Hospital of the University of Pennsylvania, and the Harrison Department of Surgical Research, University of Pennsylvania School of Medicine in Philadelphia. The work was supported by a research grant (DA-29-007-MD-599) from the Department of the Army.

minutes. At the time observations were made, these individuals were unconscious, tolerated the rubber mouthpiece, usually required support of the mandible, and did not respond to superficial painful stimuli. Most of them, however, were judged not to be sufficiently anesthetized for surgical intervention. Those whose electroencephalograms were available were between levels 1 and 2 as described by Kiersey *et al.* (11). Brachial arterial or antecubital venous samples were drawn at

TABLE I  
RESPIRATORY EFFECTS OF THIOPENTAL

|                                                                                                                             |                                       | Control |                 | Thiopental |                 |
|-----------------------------------------------------------------------------------------------------------------------------|---------------------------------------|---------|-----------------|------------|-----------------|
|                                                                                                                             |                                       | Control | CO <sub>2</sub> | Control    | CO <sub>2</sub> |
| W. B., white, male<br>63 yrs., Ht. 67"<br>Wt. 182 lbs.<br>No preanesthetic<br>medication<br>-----<br>Thiopental 21 mg./l.   | End exp. pCO <sub>2</sub><br>(mm. Hg) | 44      | 69              | 44         | 70              |
|                                                                                                                             | Resp. rate/min.                       | 13      | 14              | 15         | 20              |
|                                                                                                                             | Tidal vol. (cc.)                      | 245     | 610             | 240        | 910             |
|                                                                                                                             | Min. vol. (l./min.)                   | 3.2     | 8.5             | 3.6        | 18.2            |
|                                                                                                                             |                                       |         |                 |            |                 |
| A. M., white, male<br>36 yrs., Ht. 71"<br>Wt. 158 lbs.<br>No preanesthetic<br>medication<br>-----<br>Thiopental 13.7 mg./l. | End exp. pCO <sub>2</sub>             | 38      | 53              | 38         | 54              |
|                                                                                                                             | Resp. rate/min.                       | 18      | 25              | 16         | 23              |
|                                                                                                                             | Tidal vol. (cc.)                      | 310     | 750             | 350        | 1110            |
|                                                                                                                             | Min. vol. (l./min.)                   | 5.6     | 18.8            | 5.6        | 25.5            |
|                                                                                                                             |                                       |         |                 |            |                 |
| M. N., white, male<br>30 yrs., Ht. 66"<br>Wt. 140 lbs.<br>No preanesthetic<br>medication<br>-----<br>Thiopental 12.8 mg./l. | End exp. pCO <sub>2</sub>             | 40      | 61              | 41         | 62              |
|                                                                                                                             | Resp. rate/min.                       | 18      | 26              | 15         | 22              |
|                                                                                                                             | Tidal vol. (cc.)                      | 260     | 1030            | 290        | 1440            |
|                                                                                                                             | Min. vol. (l./min.)                   | 4.7     | 26.8            | 4.4        | 31.7            |
|                                                                                                                             |                                       |         |                 |            |                 |
| S. C., colored, female<br>35 yrs., Ht. 68"<br>Wt. 135 lbs.<br>Atropine 0.4 mg.<br>-----<br>Thiopental 19.9 mg./l.           | End exp. pCO <sub>2</sub>             | 40      | 60              | 40         | 59              |
|                                                                                                                             | Resp. rate/min.                       | 16      | 23              | 14         | 22              |
|                                                                                                                             | Tidal vol. (cc.)                      | 310     | 840             | 360        | 840             |
|                                                                                                                             | Min. vol. (l./min.)                   | 5.0     | 19.3            | 5.0        | 18.5            |
|                                                                                                                             |                                       |         |                 |            |                 |
| S. C., colored, female<br>35 yrs., Ht. 68"<br>Wt. 135 lbs.<br>Atropine 0.4 mg.<br>-----<br>Thiopental 14.9 mg./l.           | End exp. pCO <sub>2</sub>             | 40      | 60              | 40         | 59              |
|                                                                                                                             | Resp. rate/min.                       | 16      | 23              | 18         | 19              |
|                                                                                                                             | Tidal vol. (cc.)                      | 310     | 840             | 310        | 740             |
|                                                                                                                             | Min. vol. (l./min.)                   | 5.0     | 19.3            | 5.6        | 14.1            |
|                                                                                                                             |                                       |         |                 |            |                 |
| F. K., white, female<br>33 yrs., Ht. 63"<br>Wt. 113 lbs.<br>Atropine 0.4 mg.<br>-----<br>No level                           | End exp. pCO <sub>2</sub>             | 45      | 60              | 43         | 60              |
|                                                                                                                             | Resp. rate/min.                       | 19      | 16              | 20         | 21              |
|                                                                                                                             | Tidal vol. (cc.)                      | 230     | 490             | 240        | 350             |
|                                                                                                                             | Min. vol. (l./min.)                   | 4.4     | 7.8             | 4.8        | 7.4             |
|                                                                                                                             |                                       |         |                 |            |                 |

TABLE 1—Continued

|                                                                                                                              |                                                                                        | Control                |                           | Thiopental              |                           |
|------------------------------------------------------------------------------------------------------------------------------|----------------------------------------------------------------------------------------|------------------------|---------------------------|-------------------------|---------------------------|
|                                                                                                                              |                                                                                        | Control                | CO <sub>2</sub>           | Control                 | CO <sub>2</sub>           |
| V. W., colored, female<br>43 yrs., Ht. 66"<br>Wt. 150 lbs.<br>No preanesthetic<br>medication<br>-----<br>No level            | End exp. pCO <sub>2</sub><br>Resp. rate/min.<br>Tidal vol. (cc.)<br>Min. vol. (L/min.) | 40<br>14<br>200<br>2.8 | 53<br>16<br>570<br>9.1    | 39<br>14<br>335<br>4.7  | 53<br>16<br>740<br>11.8   |
| V. W., colored, female<br>43 yrs., Ht. 66"<br>Wt. 150 lbs.<br>No preanesthetic<br>medication<br>-----<br>No level            | End exp. pCO <sub>2</sub><br>Resp. rate/min.<br>Tidal vol. (cc.)<br>Min. vol. (L/min.) | 40<br>14<br>200<br>2.8 | 53<br>16<br>570<br>9.1    | 40<br>15<br>320<br>4.8  | 52<br>13<br>600<br>7.8    |
| E. W., colored, female<br>55 yrs., Ht. 64"<br>Wt. 125 lbs.<br>No preanesthetic<br>medication<br>-----<br>No level            | End exp. pCO <sub>2</sub><br>Resp. rate/min.<br>Tidal vol. (cc.)<br>Min. vol. (L/min.) | 44<br>12<br>340<br>4.1 | 60<br>16<br>860<br>13.8   | 44<br>12<br>400<br>4.8  | 62<br>18<br>670<br>12.5   |
| A. B., white, male<br>24 yrs., Ht. 68"<br>Wt. 155 lbs.<br>No preanesthetic<br>medication<br>-----<br>Thiopental 11.8 mg./L.  | End exp. pCO <sub>2</sub><br>Resp. rate/min.<br>Tidal vol. (cc.)<br>Min. vol. (L/min.) | 47<br>6<br>560<br>3.36 | 63<br>14<br>1280<br>17.92 | 45<br>12<br>278<br>3.34 | 63<br>16<br>1220<br>19.52 |
| M. F., white, female<br>29 yrs., Ht. 65"<br>Wt. 108 lbs.<br>No preanesthetic<br>medication<br>-----<br>Thiopental 9.9 mg./L. | End exp. pCO <sub>2</sub><br>Resp. rate/min.<br>Tidal vol. (cc.)<br>Min. vol. (L/min.) | 33<br>13<br>260<br>3.4 | 58<br>18<br>1460<br>26.3  | 39<br>9<br>340<br>3.0   | 58<br>18<br>1430<br>25.5  |
| W. G., white, male<br>25 yrs., Ht. 70"<br>Wt. 160 lbs.<br>No preanesthetic<br>medication<br>-----<br>Thiopental 9.3 mg./L.   | End exp. pCO <sub>2</sub><br>Resp. rate/min.<br>Tidal vol. (cc.)<br>Min. vol. (L/min.) | 40<br>9<br>340<br>3.1  | 53<br>20<br>1280<br>25.0  | 40<br>14<br>340<br>4.8  | 53<br>16<br>720<br>11.5   |

appropriate intervals and analyzed for thiopental by the method of Brodie *et al.* (12). The opiates, morphine sulfate (10–15 mg.) or meperidine hydrochloride (75–100 mg.), were administered intramuscularly in combination with atropine sulfate (0.4 mg.). A minimum of forty-five minutes was allowed to elapse following injection

of the opiate before the respiratory functions and response to carbon dioxide were first measured.

### RESULTS

*Thiopental.*—The effects of thiopental upon respiration were measured in 12 individuals who received no preanesthetic medication or who received atropine sulfate only. These results are presented in table 1 and summarized in table 2. In 9 subjects there was no change from the control end-expiratory  $pCO_2$  during thiopental anesthesia, whereas 2 showed a decrease and 1 an increase. The respiratory rate was unaltered in 6 subjects, increased in 3 and decreased in 3. The effect on minute volume was also variable: there was no change in 4 subjects, an increase in 6, and a decrease in 2. The respiratory minute volume response to endogenously accumulated carbon dioxide was increased from 9 per cent to 114 per cent in 5 of the subjects and decreased from 4 per

TABLE 2  
EFFECT OF THIOPENTAL ON RESPIRATION  
(Change Expressed as % of Control Values)

| Subject | $pCO_2$ | Rate | Minute Volume | Response to $CO_2$ |
|---------|---------|------|---------------|--------------------|
| W. B.   | 0       | 0    | 0             | +114               |
| A. M.   | 0       | 0    | 0             | +36                |
| M. N.   | 0       | -19  | -6            | +19                |
| S. C.   | 0       | -12  | 0             | -4                 |
| S. C.   | 0       | +12  | +12           | -27                |
| F. K.   | -4      | 0    | +9            | -5                 |
| V. W.   | 0       | 0    | +68           | +30                |
| V. W.   | 0       | 0    | +71           | -16                |
| E. W.   | 0       | 0    | +17           | -10                |
| A. B.   | -4      | +100 | 0             | +9                 |
| M. F.   | +18     | -30  | -12           | -5                 |
| W. G.   | 0       | +55  | +54           | -54                |

cent to 54 per cent in the remaining 7. The average alteration in response to increased carbon dioxide was an increase of 7 per cent over the control value.

*Thiopental Following Opiate.*—The respiratory effects of thiopental following the intramuscular injection of morphine sulfate or meperidine hydrochloride in 6 subjects are presented in table 3 and summarized in table 4. The response of one individual who received secobarbital sodium (100 mg.) intramuscularly prior to thiopental administration is included for comparison. In those subjects receiving opiates and thiopental, end-expiratory  $pCO_2$  increased in 3 cases and remained unchanged in 3. Respiratory rate was elevated in 3 individuals and lowered in 3. Minute volume was unaltered in 2 subjects, reduced in 3, and raised in the other. The response to carbon dioxide was diminished in all 6 individuals. The average reduction was 54 per cent, with a range of 40 to 74 per cent.

TABLE 3—EFFECT OF OPIATE AND THIOPENTAL ON RESPIRATION

|                                                                                                                                               |                                                                                                     | Control                 |                           | Thiopental              |                          |
|-----------------------------------------------------------------------------------------------------------------------------------------------|-----------------------------------------------------------------------------------------------------|-------------------------|---------------------------|-------------------------|--------------------------|
|                                                                                                                                               |                                                                                                     | Control                 | CO <sub>2</sub>           | Control                 | CO <sub>2</sub>          |
| B. W., white, male<br>19 yrs., Ht. 69"<br>Wt. 138 lbs.<br>Meperidine 100 mg.<br>Atropine 0.4 mg.<br>-----<br>Thiopental 7.8 mg./l.            | End exp. pCO <sub>2</sub><br>(mm. Hg)<br>Resp. rate/min.<br>Tidal vol. (cc.)<br>Min. vol. (l./min.) | 48<br>15<br>290<br>4.4  | 70<br>20<br>990<br>19.8   | 49<br>13<br>250<br>3.3  | 69<br>18<br>680<br>12.2  |
| B. W., white, male<br>19 yrs., Ht. 69"<br>Wt. 138 lbs.<br>Meperidine 100 mg.<br>Atropine 0.4 mg.<br>-----<br>Thiopental 18.9 mg./l.           | End exp. pCO <sub>2</sub><br>Resp. rate/min.<br>Tidal vol. (cc.)<br>Min. vol. (l./min.)             | 48<br>15<br>290<br>4.4  | 70<br>20<br>990<br>19.8   | 53<br>17<br>230<br>3.9  | 69<br>19<br>270<br>5.1   |
| M. F., white, female<br>29 yrs., Ht. 65"<br>Wt. 108 lbs.<br>Meperidine 75 mg.<br>Atropine 0.4 mg.<br>-----<br>Thiopental 8.2 mg./l.           | End exp. pCO <sub>2</sub><br>Resp. rate/min.<br>Tidal vol. (cc.)<br>Min. vol. (l./min.)             | 36<br>16<br>270<br>4.32 | 55<br>18<br>1130<br>20.34 | 43<br>14<br>310<br>4.36 | 54<br>16<br>690<br>11.06 |
| A. B., white, male<br>24 yrs., Ht. 68"<br>Wt. 155 lbs.<br>Meperidine 100 mg.<br>Atropine 0.4 mg.<br>-----<br>Thiopental 8.6 mg./l.            | End exp. pCO <sub>2</sub><br>Resp. rate/min.<br>Tidal vol. (cc.)<br>Min. vol. (l./min.)             | 47<br>7<br>340<br>2.4   | 61<br>14<br>1160<br>16.2  | 47<br>11<br>280<br>3.1  | 61<br>14<br>690<br>9.7   |
| R. J., white, male<br>31 yrs., Ht. 67"<br>Wt. 150 lbs.<br>Morphine sulfate<br>(12 mg.)<br>Atropine 0.4 mg.<br>-----<br>Thiopental 9.4 mg./l.  | End exp. pCO <sub>2</sub><br>Resp. rate/min.<br>Tidal vol. (cc.)<br>Min. vol. (l./min.)             | 43<br>9<br>360<br>3.24  | 60<br>12<br>1320<br>15.84 | 44<br>10<br>320<br>3.2  | 60<br>11<br>740<br>8.14  |
| W. G., white, male<br>25 yrs., Ht. 70"<br>Wt. 160 lbs.<br>Morphine sulfate<br>(12 mg.)<br>Atropine 0.4 mg.<br>-----<br>Thiopental 11.6 mg./l. | End exp. pCO <sub>2</sub><br>Resp. rate/min.<br>Tidal vol. (cc.)<br>Min. vol. (l./min.)             | 41<br>12<br>380<br>4.6  | 59<br>18<br>1420<br>25.6  | 46<br>11<br>260<br>2.8  | 59<br>12<br>540<br>6.5   |
| O. W., colored, female<br>30 yrs., Ht. 68"<br>Wt. 147 lbs.<br>Secobarbital 100 mg.<br>Atropine 0.4 mg.<br>-----<br>Thiopental 19.0 mg./l.     | End exp. pCO <sub>2</sub><br>Resp. rate/min.<br>Tidal vol. (cc.)<br>Min. vol. (l./min.)             | 34<br>20<br>230<br>4.6  | 53<br>22<br>670<br>14.7   | 34<br>17<br>270<br>4.6  | 54<br>24<br>605<br>14.5  |

TABLE 4  
EFFECT OF OPIATE AND THIOPENTAL ON RESPIRATION  
(Change Expressed as % of Control Values)

| Subject   | pCO <sub>2</sub> | Rate | Minute Volume | Response to CO <sub>2</sub> |
|-----------|------------------|------|---------------|-----------------------------|
| B. W. (D) | 0                | -13  | -25           | -42                         |
| B. W. (D) | +10              | +13  | -11           | -74                         |
| M. F. (D) | +19              | -12  | 0             | -46                         |
| A. B. (D) | 0                | +57  | + 2           | -40                         |
| R. J. (M) | 0                | +11  | 0             | -49                         |
| W. G. (M) | +12              | - 8  | -39           | -74                         |
| O. W. (S) | 0                | -15  | 0             | - 1                         |

D—Meperidine. M—Morphine. S—Secobarbital.

Data in the case in which secobarbital was administered showed no significant alteration following thiopental other than a 15 per cent decrease in respiratory rate, which was offset by a similar increase in tidal volume.

### DISCUSSION

These data indicate that respiratory depression produced by thiopental alone, in the dosage range studied, was minimal. In some individuals there was even improvement in respiratory response to carbon dioxide following thiopental. It was thought at first that this observation might be attributed in part to the fact that the patients were apprehensive and the control data did not represent a normal response to carbon dioxide. The study was therefore completed on volunteer subjects. These relaxed individuals, who were neither anxious nor tense, reacted in similar fashion, so that other explanations must be sought.

In marked contrast to this was the profound \* respiratory depression recorded in the individuals receiving thiopental after injection of morphine or meperidine. The question which naturally arises is: Was the respiratory depression noted in the second group of individuals due only to the opiates, or were the opiate and thiopental synergistic rather than additive? In a study of the effect on respiration of a large variety of opiate and opiate-like drugs, the average depression in response to endogenously accumulated carbon dioxide was of the same order of magnitude as that exhibited by the individuals who received thiopental following an opiate (13). On the basis of these findings, it is our present opinion that the major part of the respiratory effect of the combination was due to the opiate, and that the addition of the thiopental caused little further respiratory depression.

Opiates almost invariably produce a rise in resting end-expiratory

\* Statistical analysis of the difference between opiate-thiopental and opiate alone by the Fischer T method:  $p < .01$ .

pCO<sub>2</sub> ranging from 2 to 12 mm. of mercury, and a sharply diminished respiratory response to endogenously accumulated carbon dioxide as measured by minute volume. The effects upon respiration may progress or persist at their maximum for as long as five hours. The use of "control" measurements taken before or shortly after opiate administration may vary considerably from "control" readings an hour or two later when opiate depression may have progressed. In addition to the above, one must also take into account that the respiratory effects of two depressants acting simultaneously may be entirely different from that of the two depressants acting individually.

These data support the belief that measurements of respiratory rate and minute volume alone may be misleading in determining the degree of respiratory depression. M. F. (table 4) showed no change in respiratory minute volume and only a 12 per cent decrease in rate, yet her resting end-expiratory pCO<sub>2</sub> had risen 19 per cent, and her response to carbon dioxide revealed a 46 per cent depression. Similarly A. B. (table 4) showed an increase in both rate and minute volume yet his response to carbon dioxide had diminished 40 per cent.

The effect of thiopental following secobarbital is in keeping with earlier observations (9) that barbiturates in the doses commonly employed for pre-anesthetic medication have an insignificant effect upon respiration.

It would appear, therefore, that if the respiratory depressant effects of the opiates are so marked and those of thiopental as studied here are minimal, it is unprofitable to attempt to study the relatively small changes due to thiopental in the presence of the large changes introduced by opiates.

The problem of defining the degree of depression, or as it is termed clinically "the depth of anesthesia" during thiopental administration is far from solved. Consider the objective methods available: First, the blood levels of thiopental. These are subject to wide individual variation even when the rate of injection, total dose, and concentration are rigidly controlled. When the initial dose is variable, the phenomenon of "acute tolerance" may be introduced and further decrease the reliability of blood levels in reflecting depth of anesthesia (14, 15). Secondly, total dose per unit time has been used, but here again the influence of the size and rate of the initial injection may make this method totally unreliable. Third, electroencephalographic levels have been defined and correlated with the clinical depth of anesthesia. These are, however, not well correlated with blood levels of thiopental. Lastly, depression of reflex response to electrical stimulation has been used as a method of determining the depth of anesthesia (16, 17).

Clinical signs of depth of thiopental anesthesia are also of questionable reliability when attempts are made to correlate them with objective measurements. The classical signs, so useful for diethyl ether, are of much less use during thiopental anesthesia. Movement, phona-

tion, and laryngospasm in response to surgical manipulation are not only inconstant guides of depth of anesthesia, but are also undesirable for obvious reasons. We must admit, therefore, that the determination of depth of thiopental anesthesia is difficult to define qualitatively.

Our data concerning the lack of respiratory depression from thiopental should not be misconstrued. Thiopental administered in sufficient dosage does result in respiratory depression even in normal individuals. It is evident that all of the individuals included in this study were relatively lightly anesthetized, as judged by their clinical signs, blood levels, electroencephalographic levels, rate of administration, and total dosage.

### SUMMARY

Data on normal volunteers or relatively healthy patients have been presented to show that the respiratory depressant effect of thiopental over a relatively wide blood level range is minimal. Following pre-anesthetic medication with opiates, respiratory depression with thiopental is profound.

The errors inherent in studying the respiratory depressant effects of a slightly depressant drug (thiopental) in the presence of a markedly depressant one (opiate) are discussed.

The problem of determining depth of thiopental anesthesia is considered.

### REFERENCES

1. Patrick, Robert T., and Faulconer, A., Jr.: Respiratory Studies During Anesthesia with Ether and with Pentothal Sodium, *Anesthesiology* **13**: 252 (May) 1952.
2. Colon-Yordan, E., Mackrell, T. N., and Stone, H. H.: Evaluation of Use of Thiopental and Decamethonium Bromide for Rapid Endotracheal Intubation, *Anesthesiology* **14**: 255 (May) 1953.
3. Etsten, B., and Li, T. H.: Hemodynamic Changes During Thiopental Anesthesia in Humans: Cardiac Output, Stroke Volume, Total Peripheral Resistance, and Intrathoracic Blood Volume, *J. Clin. Invest.* **34**: 500 (March) 1955.
4. Elder, J. D., Jr., Nagano, S. M., Eastwood, D. W., and Harnagel, D.: Circulatory Changes Associated with Thiopental Anesthesia in Man, *Anesthesiology* **16**: 394 (May) 1955.
5. Lachman, R. J., Long, J. H., and Krumpelman, L. W.: Changes in Blood Gases Associated with Various Methods of Induction for Endotracheal Anesthesia, *Anesthesiology* **16**: 29 (Jan.) 1955.
6. Fieldman, E. J., Ridley, R. W., and Wood, E. H.: Hemodynamic Studies During Thiopental Sodium and Nitrous Oxide Anesthesia in Humans, *Anesthesiology* **16**: 473 (July) 1955.
7. Eckenhoff, J. E., Heldrich, M., and Hege, M. J. D.: Method for Studying Respiratory Functions in Awake or Anesthetized Patients, *Anesthesiology* **17**: 66 (Jan.) 1956.
8. Loewy, A.: Zur Kenntniss der Erregbarkeit des Athmencentrums: *Arch. ges. Physiol.* **47**: 601, 1890.
9. Eckenhoff, J. E., Heldrich, M., and Hege, M. J. D.: Effect of Narcotics Upon Respiratory Response to Carbon Dioxide in Man, *Surgical Forum* **5**: 681, 1954.
10. Loescheke, H. H., Sweet, A., Kough, R. H., and Lambertsen, C. J.: Effect of Morphine and of Meperidine Upon the Respiratory Response of Normal Men to Low Concentrations of Inspired Carbon Dioxide, *J. Pharm. & Exper. Therap.* **108**: 376 (July) 1953.
11. Kiersey, D. K., Bickford, R. G., and Faulconer, A., Jr.: Electroencephalographic Patterns Produced by Thiopental Sodium During Surgical Operations; Description and Classification, *Brit. J. Anaesth.* **23**: 141 (July) 1951.



12. Brodie, B. B., *et al.*: Fate of Thiopental in Man and Method for its Estimation in Biological Material, *J. Pharmacol. and Exper. Therap.* **98**: 85 (Jan.) 1950.
13. Eckenhoff, J. E., Helrich, M., Hege, M. J. D., and Jones, R. E.: Respiratory Hazards of Opiates and Other Narcotic Analgesics, *Surg., Gynec. & Obst.* **101**: 701 (Dec.) 1955.
14. Mark, L. C., Papper, E. M., Brodie, B. B., and Rovenstine, E. A.: Quantitative Pharmacologic Studies with Pentothal New York *J. Med.* **49**: 1546 (July 1) 1949.
15. Brodie, B. B., Burns, J. J., Lief, P. A., and Papper, E. M.: Intravenous Anesthetics—New Concepts; Experimental Aspects, *Anesth. & Analg.* **31**: 145 (May-June) 1952.
16. Beecher, H. K., and Moyer, C. A.: Mechanisms of Respiratory Failure under Barbiturate Anesthesia (Evipal, Pentothal), *J. Clin. Invest.* **20**: 549 (Sept.) 1941.
17. Moyer, Carl A., and Beecher, H. K.: Effects of Barbiturate Anesthesia (Evipal and Pentothal Sodium) Upon Integration of Respiratory Control Mechanisms. Study Directed Toward Improvement of Methods for Preclinical Evaluation of Anesthetic Agents, *J. Clin. Invest.* **21**: 429 (July) 1942.
